# Supplementary material for: Perforated vesicles composed of amphiphilic diblock copolymer: new artificial biomembrane model of nuclear envelope
Source: Royal Society of Chemistry journal article supplement (doi:10.1039/c9sm01832h), 2019-01-01
Supplement: c9sm01832h1.pdf [file c9sm01832h1.pdf]

Electronic Supplementary Information (ESI)

## Perforated vesicles composed of amphiphilic diblock copolymer: New artificial biomembrane model of nuclear envelope

Eri Yoshida

Department of Applied Chemistry and Life Science, Toyohashi University of Technology  
1-1 Hibarigaoka, Tempaku-cho, Toyohashi, Aichi 441-8580, Japan  
E-mail: eyoshida@chem.tut.ac.jp

### <sup>1</sup>H NMR spectrum to determine the monomer conversions.

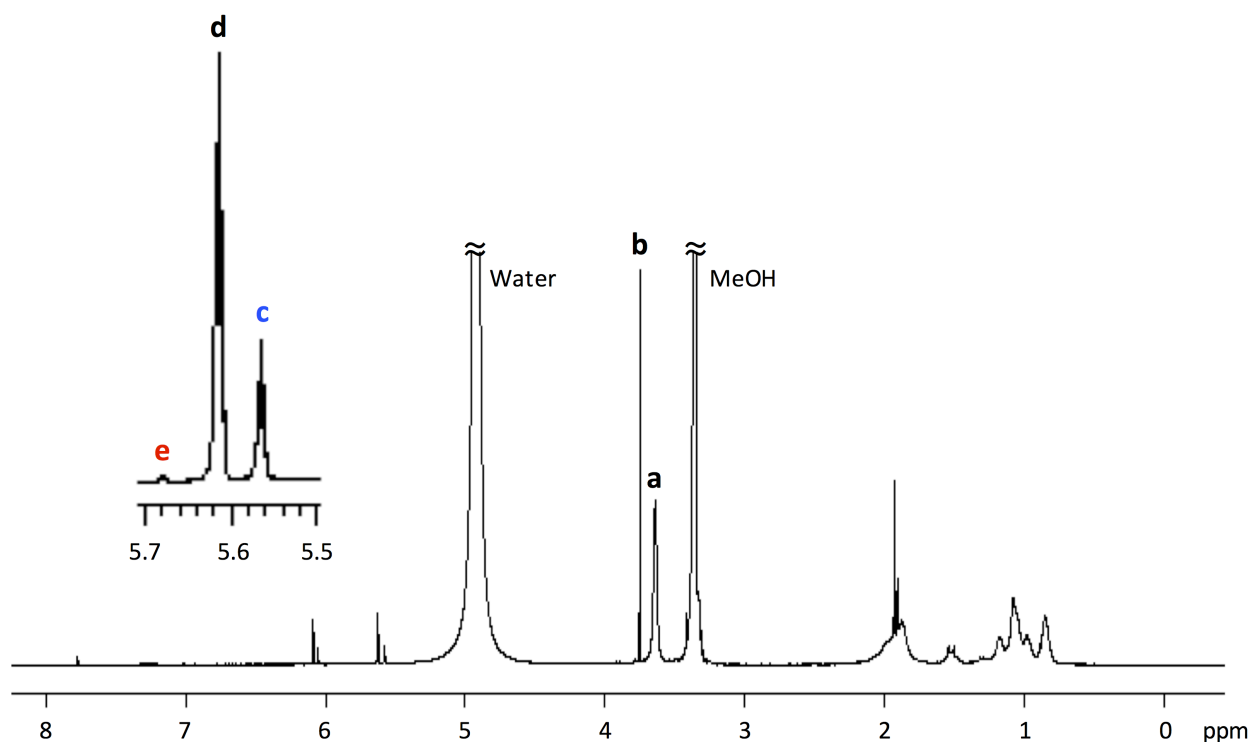

**Figure S1.** <sup>1</sup>H NMR spectrum for the reaction mixture obtained by the photo NMP-induced self-assembly in MeOH/water (3/1 v/v). The mixture was for PMAA<sub>210</sub>-*b*-P(MMA<sub>0.833</sub>-*r*-MAA<sub>0.152</sub>-*r*-TPMA<sub>0.015</sub>)<sub>347</sub> and the unreacted monomers. The methoxy protons of MMA (**a**) polymerized and (**b**) unreacted. The vinyl protons of the unreacted monomers of (**c**) MAA, (**d**) MMA, and (**e**) TPMA. CD<sub>3</sub>OD/CDCl<sub>3</sub> = 3/1 v/v
